# Supplementary material for: Genome Analysis of the Janthinobacterium sp. Strain SLB01 from the Diseased Sponge of the Lubomirskia baicalensis
Source: MDPI journal article supplement (doi:10.3390/cimb43030156), 2021-12-11
Supplement: s1 [file s1]

**Table S9. Conservative and variable hydrolytic proteins in *Janthinobacterium* sp. SLB01**

We compared the set of hydrolytic proteins for *Janthinobacterium* sp. SLB01 and closer species in Table S8. Here in Table S9 we divided these proteins to conservative (common for group of closer species) and variable, specific for *Janthinobacterium* sp. SLB01, which have no homologs in genomes of closer species.

| <i>Janthinobacterium</i> sp. SLB01 |                                                                   | Signal peptide type * |
|------------------------------------|-------------------------------------------------------------------|-----------------------|
| Locus Tag                          | Annotation                                                        |                       |
| Conservative proteins              |                                                                   |                       |
| F3B38_RS11740                      | alpha-amylase                                                     | SP                    |
| F3B38_RS02140                      | caspase family                                                    | SP                    |
| F3B38_RS10600                      | chitinase                                                         | –                     |
| F3B38_RS15505                      | chitinase                                                         | –                     |
| F3B38_RS21655                      | chitinase                                                         | LIPO                  |
| F3B38_RS10605                      | chitinase C-terminal domain-containing                            | LIPO                  |
| F3B38_RS12205                      | hemolysin III family                                              | –                     |
| F3B38_RS00660                      | ShlB/FhaC/HecB family hemolysin secretion/activation              | SP                    |
| F3B38_RS01330                      | ShlB/FhaC/HecB family hemolysin secretion/activation              | SP                    |
| F3B38_RS22200                      | ShlB/FhaC/HecB family hemolysin secretion/activation              | SP                    |
| F3B38_RS08250                      | patatin-like phospholipase family                                 | –                     |
| F3B38_RS09905                      | patatin-like phospholipase family                                 | –                     |
| F3B38_RS11790                      | patatin-like phospholipase family                                 | –                     |
| F3B38_RS02525                      | patatin-like phospholipase family                                 | SP                    |
| F3B38_RS05610                      | patatin-like phospholipase family                                 | LIPO                  |
| F3B38_RS12320                      | patatin-like phospholipase family                                 | LIPO                  |
| F3B38_RS06110                      | phospholipase                                                     | SP                    |
| F3B38_RS13770                      | phospholipase                                                     | –                     |
| F3B38_RS16045                      | phospholipase A                                                   | –                     |
| F3B38_RS07965                      | phospholipase D family                                            | –                     |
| F3B38_RS10925                      | phospholipase D family                                            | LIPO                  |
| F3B38_RS14055                      | phospholipase D family                                            | SP                    |
| F3B38_RS18195                      | triacylglycerol lipase                                            | SP                    |
| F3B38_RS11605                      | U32 family peptidase                                              | –                     |
| F3B38_RS11600                      | U32 family peptidase collagenase                                  | –                     |
| Variable proteins                  |                                                                   |                       |
| F3B38_RS18770                      | phospholipase C, phosphocholine-specific                          | TAT                   |
| F3B38_RS22070                      | alpha/beta hydrolase                                              | –                     |
| F3B38_RS15410                      | alpha/beta hydrolase                                              | SP                    |
| F3B38_RS15580                      | caspase family protein                                            | –                     |
| F3B38_RS15585                      | caspase family protein                                            | –                     |
| F3B38_RS17830                      | caspase family protein                                            | –                     |
| F3B38_RS06825                      | family 43 glycosylhydrolase                                       | SP                    |
| F3B38_RS02090                      | glycoside hydrolase family 127 protein                            | SP                    |
| F3B38_RS24650                      | glycoside hydrolase family 3 C-terminal domain-containing protein | –                     |
| F3B38_RS13215                      | glycoside hydrolase family 32 protein                             | –                     |
| F3B38_RS04520                      | S8 family serine peptidase                                        | –                     |
| F3B38_RS11800                      | serine hydrolase                                                  | SP                    |
| F3B38_RS08740                      | SGNH/GDSL hydrolase family protein                                | –                     |
| F3B38_RS17735                      | SOS response-associated peptidase family                          | –                     |
| F3B38_RS17775                      | SOS response-associated peptidase family                          | –                     |
| F3B38_RS13500                      | trypsin-like peptidase domain-containing                          | SP                    |

\* SP "standard" secretory signal peptides transported by the Sec translocon and cleaved by Signal Peptidase I (Lep); LIPO: lipoprotein signal peptides transported by the Sec translocon and cleaved by Signal Peptidase II (Lsp); TAT: Tat signal peptides transported by the Tat translocon and cleaved by Signal Peptidase I (Lep); The dash "--" means no signal peptide was detected.
