# Supplementary material for: Genome Analysis of the Janthinobacterium sp. Strain SLB01 from the Diseased Sponge of the Lubomirskia baicalensis
Source: MDPI journal article supplement (doi:10.3390/cimb43030156), 2021-12-11
Supplement: s1 [file s1]

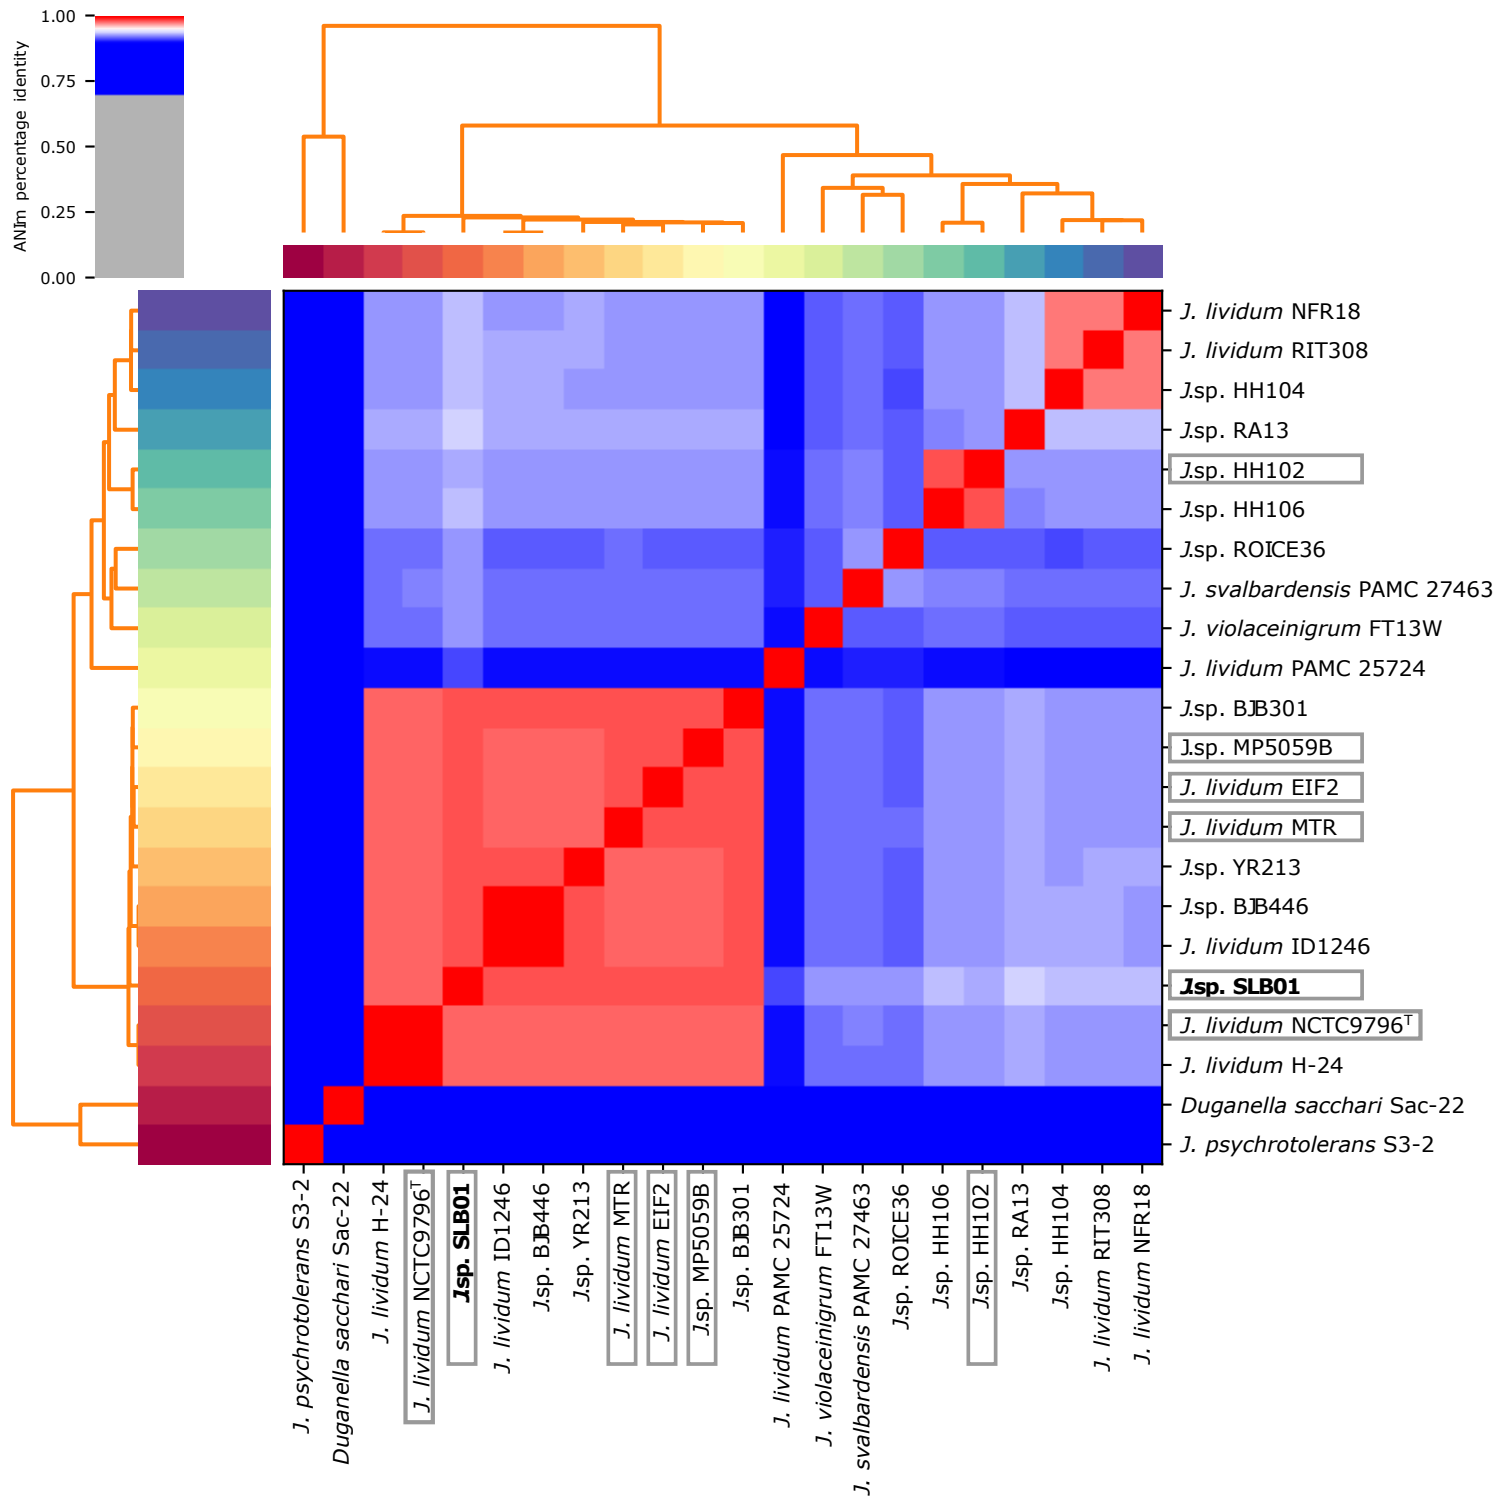

Figure S1. Average Nucleotide % Identity (ANI) comparisons between *Janthinobacterium* sp. SLB01 and close species with *Duganella sacchari* Sac-22 as outgroup
